# Supplementary material
Source: PubMed Central journal article supplement (PMC2763531)
Supplement: NIHMS120079-supplement-01.pdf [file NIHMS120079-supplement-01.pdf]

Type of file: table

Label: 5

Filename: table\_5.doc

Supplemental Table 1: Summary of studies that used DCE-MRI to predict clinical outcome along with whether increases perfusion parameters were beneficial or punitive for survival.

| Author           | Tumor Type         | n= | Tx      | Perfusion method                                         | Endpoints                                | Changes in perfusion/ permeability (p<0.05) |        |         |        | Comments                                                                                                                                                                                                    |
|------------------|--------------------|----|---------|----------------------------------------------------------|------------------------------------------|---------------------------------------------|--------|---------|--------|-------------------------------------------------------------------------------------------------------------------------------------------------------------------------------------------------------------|
|                  |                    |    |         |                                                          |                                          | Tx time                                     | ↑ Mets | ↑ Local | ↑ Surv |                                                                                                                                                                                                             |
| Mayr (1996)      | Cervical carcinoma | 17 | Rx      | Slope, rSI                                               | Local recurrence, Mets DSF               | Pre                                         | □      | □       | □      | Higher rSI (>2.8) during early therapy predicted low local recurrence. 50% of patients with rSI<2.8 have recurrences 4 months post Rx compared to 100% of patients with rSI>2.8.                            |
|                  |                    |    |         |                                                          |                                          | During                                      |        | ↓↓      |        |                                                                                                                                                                                                             |
|                  |                    |    |         |                                                          |                                          | Post                                        | □      | □       | □      |                                                                                                                                                                                                             |
| Mayr (2000)      | Cervical carcinoma | 16 | Rx      | rSI, slope                                               | Local recurrence                         | Pre                                         |        |         |        | 88% tumor recurrence for tumors with low enhancement regions (10th percentile RSI<2.5).                                                                                                                     |
|                  |                    |    |         |                                                          |                                          | During                                      |        | ↓↓      |        |                                                                                                                                                                                                             |
|                  |                    |    |         |                                                          |                                          | Post                                        |        |         |        |                                                                                                                                                                                                             |
| Loncaster (2002) | Cervical carcinoma | 55 | Rx      | SI <sub>max</sub> , Amplitude, Kep                       | Disease specific survival, PO2.          | Pre                                         | □      | □       | ↑↑     | At the time of analysis (5yrs), only 55% of patients with large, poorly enhanced tumors (Amplitude) were alive compared with 92% of patients with small, well-enhanced tumors.                              |
|                  |                    |    |         |                                                          |                                          | During                                      |        |         |        |                                                                                                                                                                                                             |
|                  |                    |    |         |                                                          |                                          | Post                                        | □      | □       | □      |                                                                                                                                                                                                             |
| Hoskin (1999)    | Head & neck cancer | 13 | Rx      | T <sub>max</sub> , Slope & E(signal enhancement)         | Disease free & local failure-recurrence. | Pre                                         |        |         |        | Increased perfusion (E>8, T <sub>max</sub> =23sec) post therapy in tumors that failed locally                                                                                                               |
|                  |                    |    |         |                                                          |                                          | During                                      |        |         |        |                                                                                                                                                                                                             |
|                  |                    |    |         |                                                          |                                          | Post                                        |        | ↑↑      | □      |                                                                                                                                                                                                             |
| Fujimoto (2003)  | NSCLC              | 94 | Sx      | MER, SI <sub>max</sub> ,T <sub>max</sub> , Washout,slope | survival and histopathology (MVD), VEGF  | Pre                                         | □      | □       | ↓↓     | Patients with higher slope had significantly shorter overall survival time. Risk Ratio:1.036. High slope (> 37.3%/min) median survival time~80mo, while low slope median survival time ~ 120 months post Sx |
|                  |                    |    |         |                                                          |                                          | During                                      |        |         |        |                                                                                                                                                                                                             |
|                  |                    |    |         |                                                          |                                          | Post                                        | □      | □       | □      |                                                                                                                                                                                                             |
| Dunst (2001)     | Ewing              | 79 | Sx,Rx & | % non                                                    | Event free &                             | Pre                                         | ↓↓     |         | ↑↑     | Correlation between tumor size and                                                                                                                                                                          |

|                |               |     |                 |                                             |                                        |        |   |    |      |                                                                                                                                                                   |
|----------------|---------------|-----|-----------------|---------------------------------------------|----------------------------------------|--------|---|----|------|-------------------------------------------------------------------------------------------------------------------------------------------------------------------|
|                | sarcoma       |     | Chx             | perfused areas in a tumor volume = necrosis | overall survival, necrosis, tumor size | During |   |    |      | necrosis. Metastasis increased with necrosis. 55% of the patients with necrosis lived 3 years , compared 100% of patients without necrosis.                       |
| Wong (1998)    | Glioma        | 121 | (not specified) | MRU & DRU                                   | Survival and histopathology            | Pre    | □ | □  | ↓↓   | higher MRU, shorter survival : Hazard Ratio=2.8.                                                                                                                  |
|                |               |     |                 |                                             |                                        | During |   |    |      |                                                                                                                                                                   |
|                |               |     |                 |                                             |                                        | Post   | □ | □  | □    |                                                                                                                                                                   |
| Mills (2006)   | Glioma        | 27  | Sx +/-          | rCBV, Ktrans                                | Survival & Tumor grade                 | Pre    |   |    | ↑↑   | Mild-moderate positive correlation between Ktrans and Survival in high grade(III , IV) glioma                                                                     |
|                |               |     |                 |                                             |                                        | During |   |    |      |                                                                                                                                                                   |
|                |               |     |                 |                                             |                                        | Post   |   |    |      |                                                                                                                                                                   |
| Cao (2006)     | Glioma        | 20  | Rx, Chx +/-     | Ktrans & Ve                                 | Survival                               | Pre    | □ | □  | ↑ Ve | Patient age & Ve correlated with survival                                                                                                                         |
|                |               |     |                 |                                             |                                        | During |   |    |      |                                                                                                                                                                   |
|                |               |     |                 |                                             |                                        | Post   | □ | □  | □    |                                                                                                                                                                   |
| Gilles (1993)  | Breast cancer | 26  | Sx,Rx & Chx     | Signal enhancement                          | Local recurrence                       | Pre    |   |    | ↑↑   | Patients with local relapse had enhancement after 1 min 34 sec. Gd-DOTA was used. Mean time of recurrence 6.4 years.                                              |
|                |               |     |                 |                                             |                                        | During |   |    |      |                                                                                                                                                                   |
|                |               |     |                 |                                             |                                        | Post   |   | □  |      |                                                                                                                                                                   |
| Pickles (2005) | Breast cancer | 48  | Chx & Sx        | Ktrans, Kep and Ve                          | local response (Δtumor volume )        | Pre    | □ | ↓↓ | □    | Significant reduction in Ktrans & Kep for responders after treatment, while Ve increased in non responders. Responder= decrease in more than 65% of tumor volume. |
|                |               |     |                 |                                             |                                        | During |   |    |      |                                                                                                                                                                   |
|                |               |     |                 |                                             |                                        | Post   | □ | □  | □    |                                                                                                                                                                   |

Tx= treatment, Sx= Surgery, Rx= Radiation Therapy, Chx= Chemotherapy

SI= signal Intensity, rSI=relative signal intensity, Max= Maximum, SImax = Maximum Signal intensity . SIprior = Signal intensity before injection. MER= Maximum Enhancement Ratio = (SImax -SIprior)x100/ Siprior. Slope= (SImax - SIprior)x100 / (SIprior

Tmax= Time to maximum enhancement/intensity, MRU=Maximum Uptake Ratio

DRU= Delayed Uptake Ratio, rCBV= Relative Cerebral blood volume.

Ve= Volume of extracellular space, Ktrans=K1= transfer coefficient (delivery), Kep=K2= transfer coefficient (efflux)

MVD= Microvascular Density, VEGF= Vascular Endothelial factor

NSCLC= Non Small Cell Lung  
Cancer

DSF= disease free survival
